# Supplementary material
Source: PubMed Central journal article supplement (PMC4023872)
Supplement: NIHMS545532-supplement-Supp_Fig_S1A.pdf [file NIHMS545532-supplement-Supp_Fig_S1A.pdf]

Supplemental Figure 1. In situ hybridization for 352 mRNAs

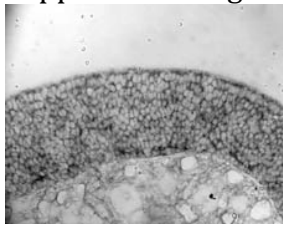

0610007P14Rik

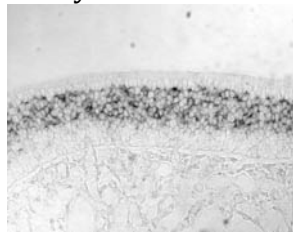

1700012B09Rik

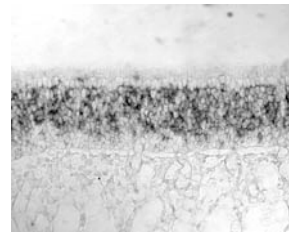

4930562D19Rik(Ccdc157)

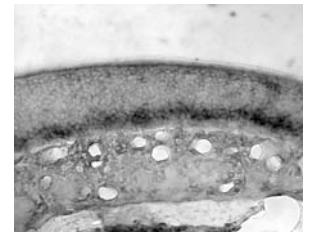

Ablim1

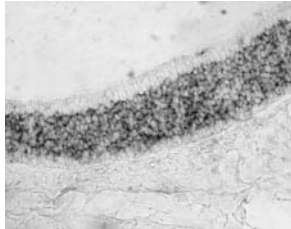

0610012D17Rik (Tctex1d2)

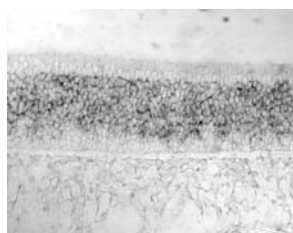

1700013E18Rik

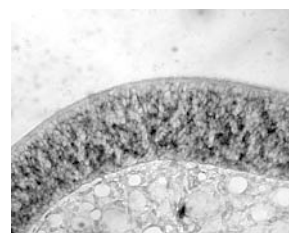

6430500D05Rik

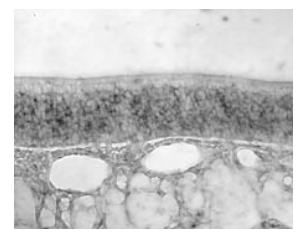

Ablim2

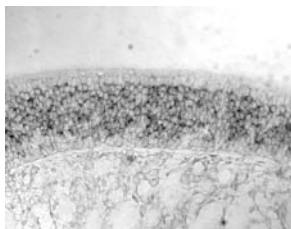

1110017D15Rik

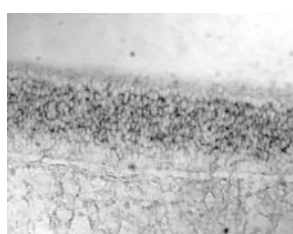

1700027A23Rik

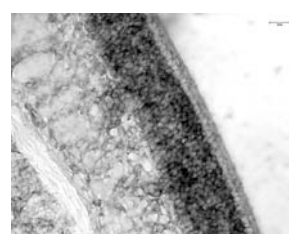

6430706D22Rik (n50j)

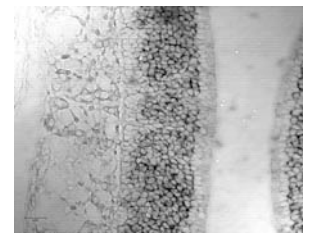

Acsf6

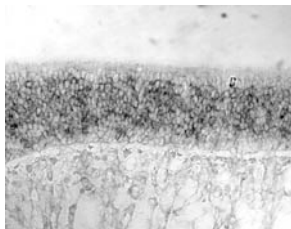

1700001L19Rik

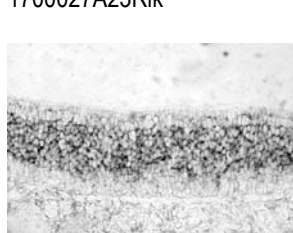

2310067E08Rik (Endod1)

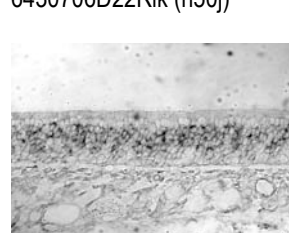

A330021E22Rik

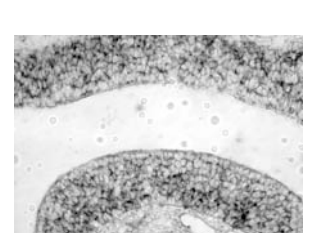

Actr3

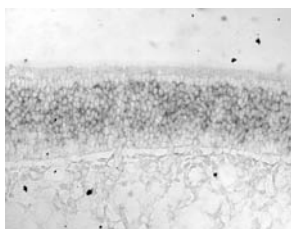

1700003M02Rik

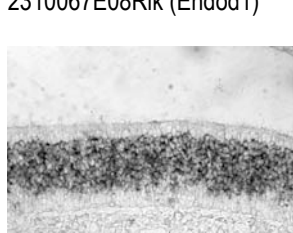

4632412N22Rik (Fam179a)

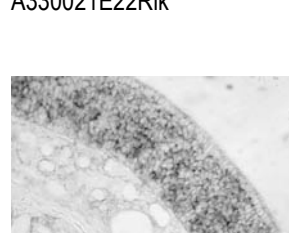

Abcd2

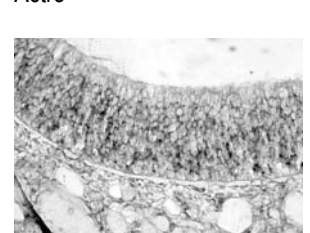

Acvr1

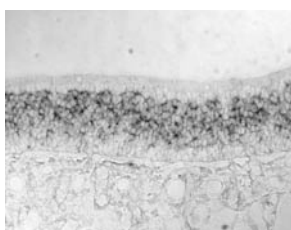

1700009P17Rik

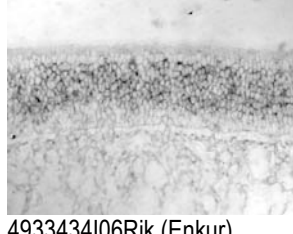

4933434I06Rik (Enkur)

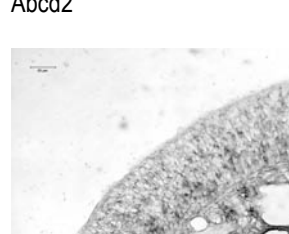

Abl1

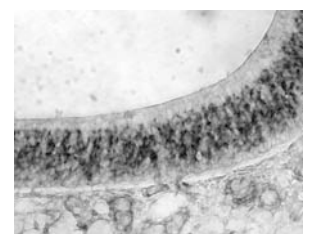

Adipor1

Supplemental Figure 1. In situ hybridization for 352 mRNAs

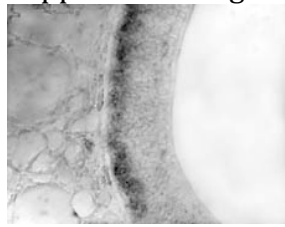

Agrin

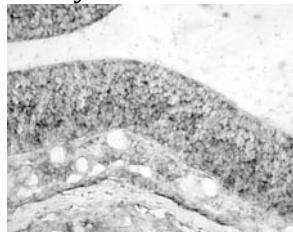

Arid1a

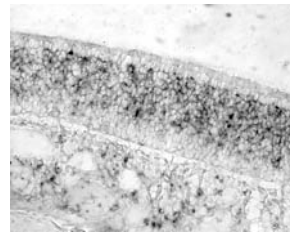

B830017H08Rik

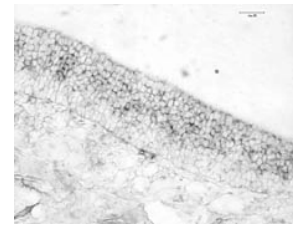

Bcl6

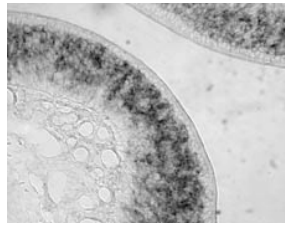

Al790298 (Cams1)

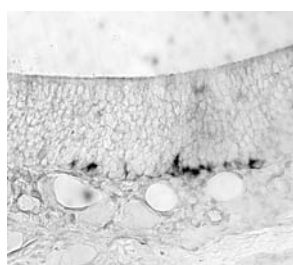

Ascl1 (Mash1)

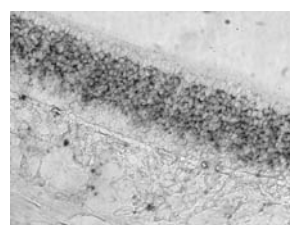

Bat5

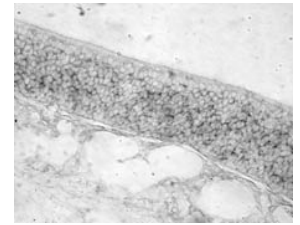

Bcl11a

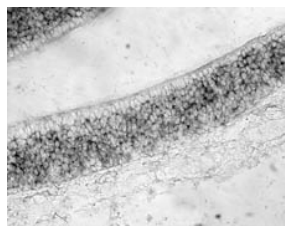

AK129341

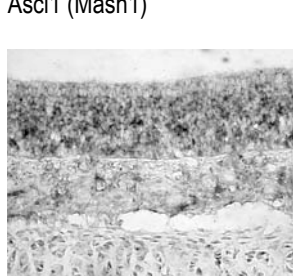

Astn1

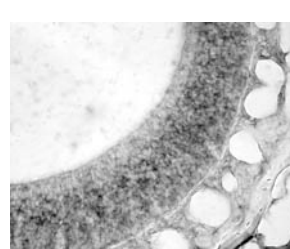

Bbs2

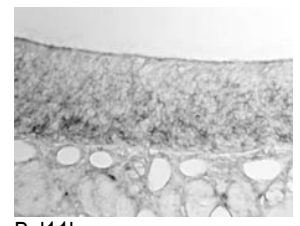

Bcl11b

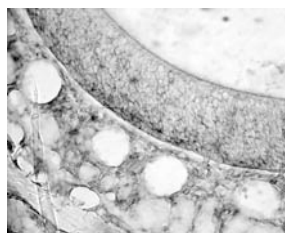

Alcam

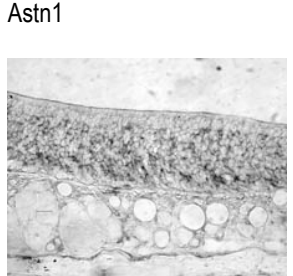

Atf4

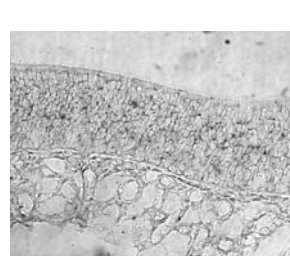

Bbs7

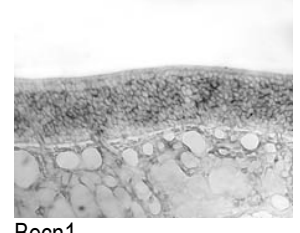

Becn1

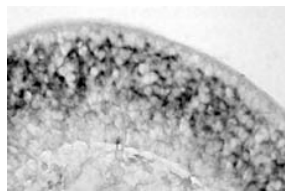

Ano2 (Tmem18; n64J)

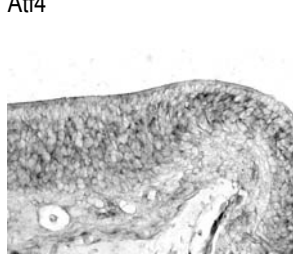

Atf6

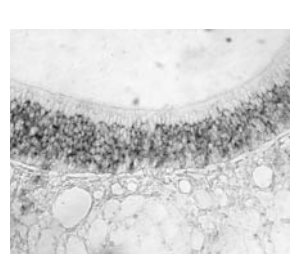

BC038479

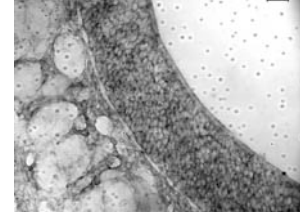

Bin3

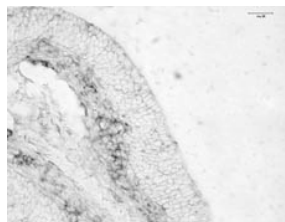

Arhgdib

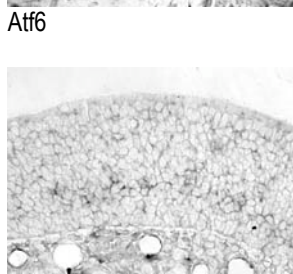

B2m

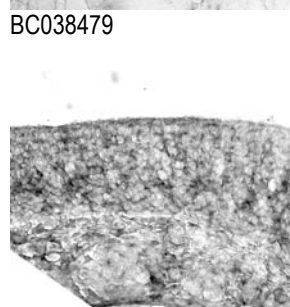

Bcl2l11

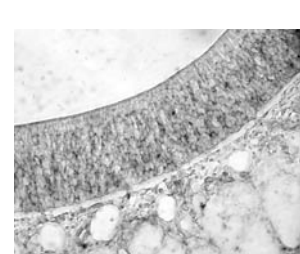

Bmi1

Supplemental Figure 1. In situ hybridization for 352 mRNAs

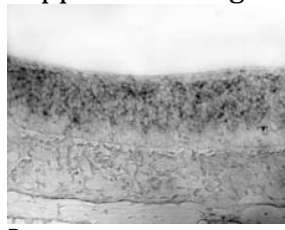

Bmper

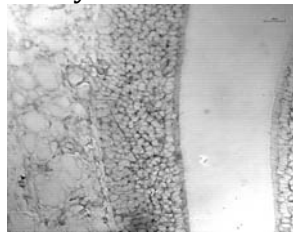

Capza1

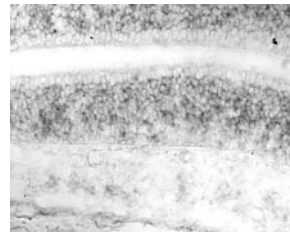

Ccdc39

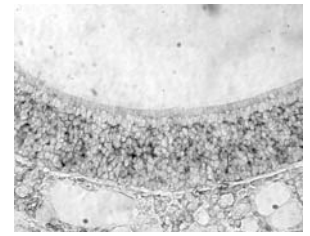

Cdh15

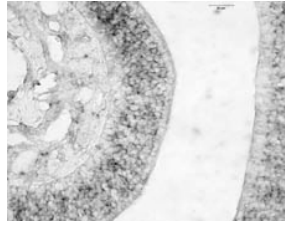

Bnip3

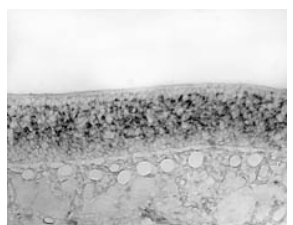

Caskin1

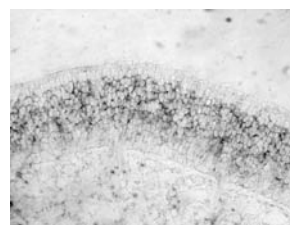

Ccdc40

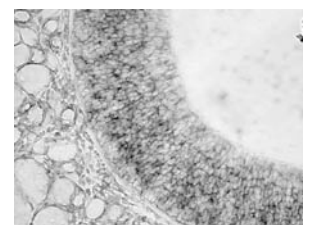

Cdk5

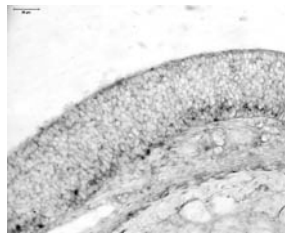

Btg3

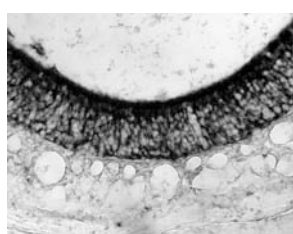

Cbr2

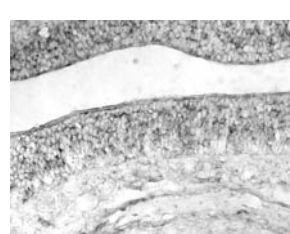

Ccdc113

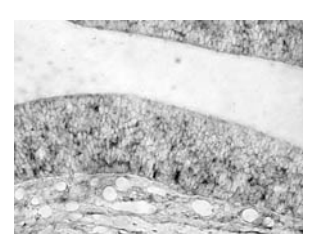

Cdon

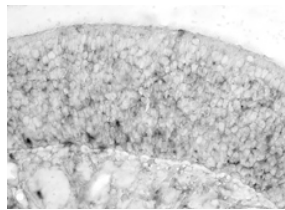

C1qA

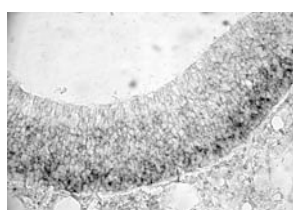

Cbx2

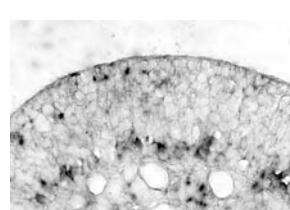

Ccnb2

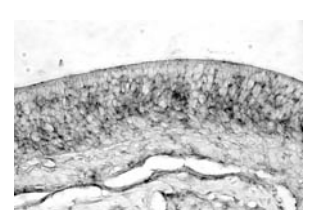

Cdv1

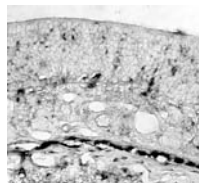

C1qB

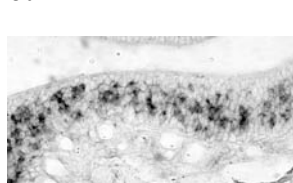

Cbx4

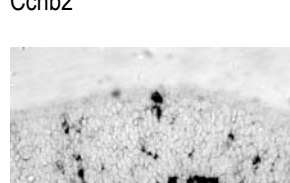

Ccnd1

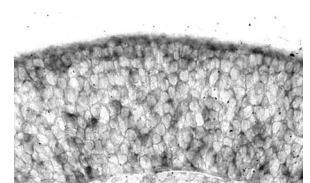

Celsr1

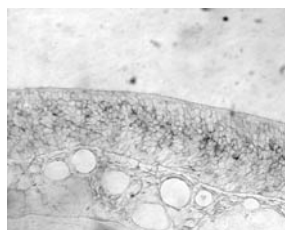

C030009J22Rik

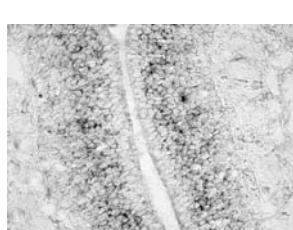

Cbx8

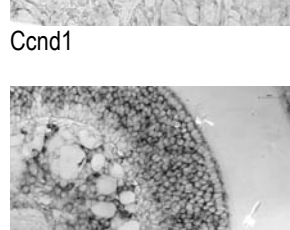

CD81

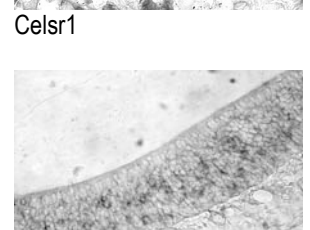

Cetrn2
