# Supplementary material
Source: PubMed Central journal article supplement (PMC4023872)
Supplement: NIHMS545532-supplement-Supp_Fig_S1B.pdf [file NIHMS545532-supplement-Supp_Fig_S1B.pdf]

Supplemental Figure 1. In situ hybridization for 352 mRNAs

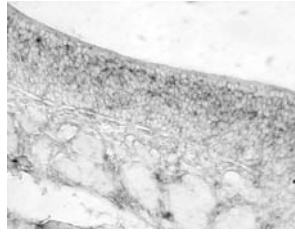

Ches1

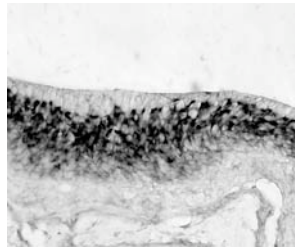

Chga

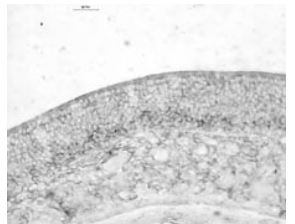

Chl1

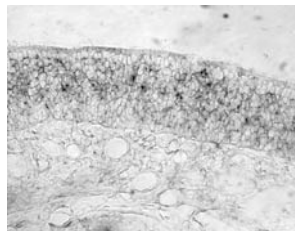

Chmp1b

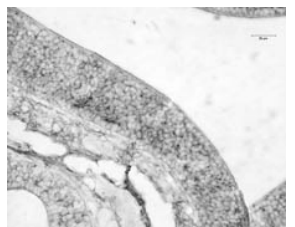

Chp

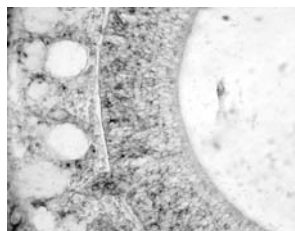

Clca2

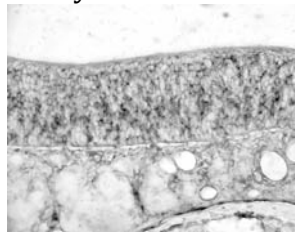

Clc4a

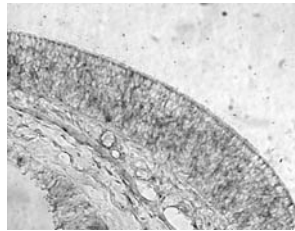

Cldn9

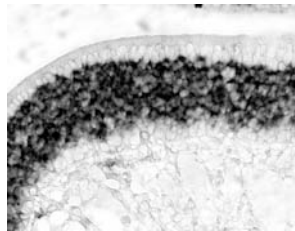

Clgn

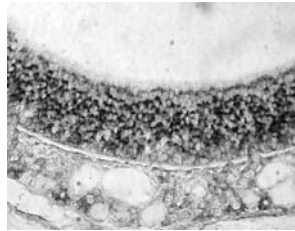

Clstn1

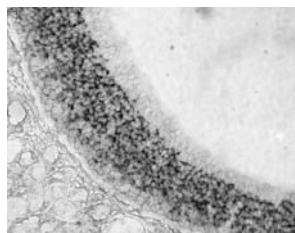

Clstn2

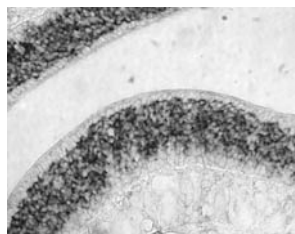

Cntn4

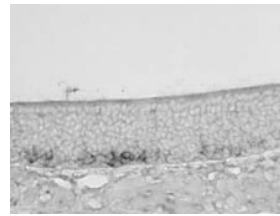

Col9a2

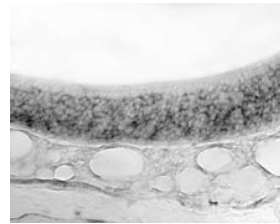

Cpe

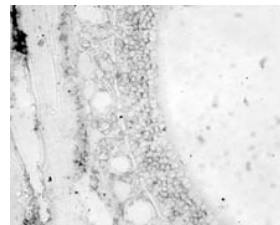

Creb3l1 (Oasis)

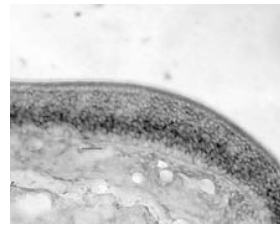

Crmp1

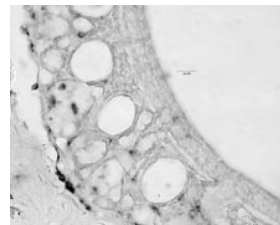

Csf1r

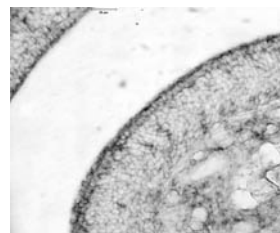

Csrp2

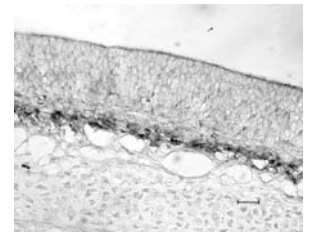

Cxcl12

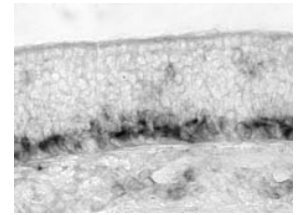

Cxcr4

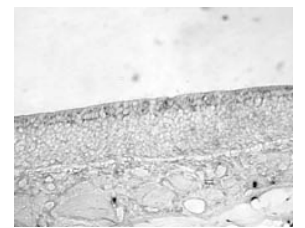

Cxcr7

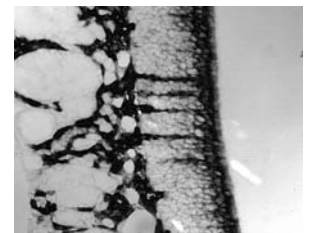

Cyp2a4/Cyp2a5

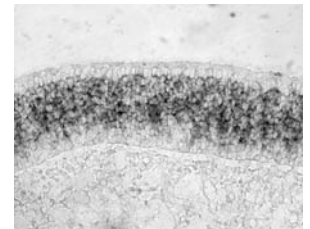

D430042O09Rik

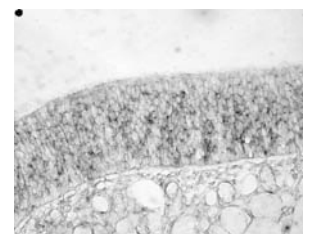

Dab1

Supplemental Figure 1. In situ hybridization for 352 mRNAs

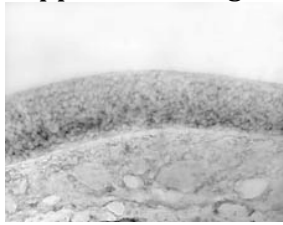

Dab2ip

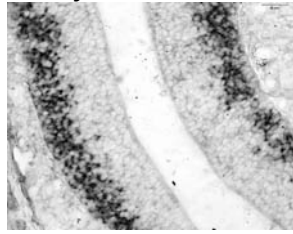

Dpysl3

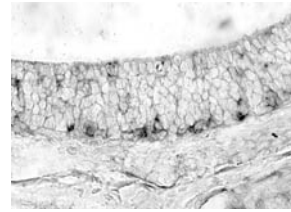

Ect2

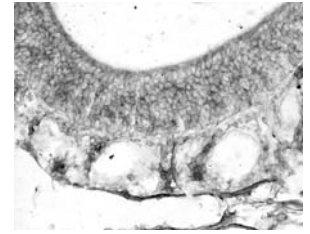

Eomes

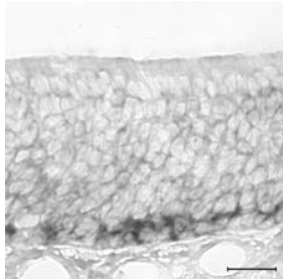

Dbn1

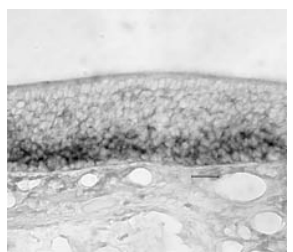

Dpysl5

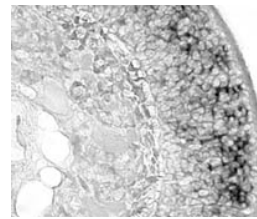

Efn3

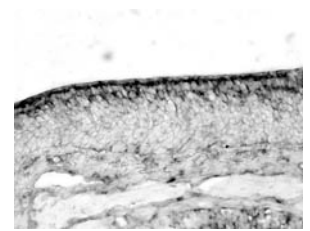

Epas1

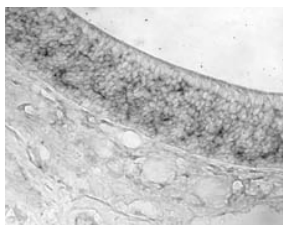

Ddit3 (CHOP)

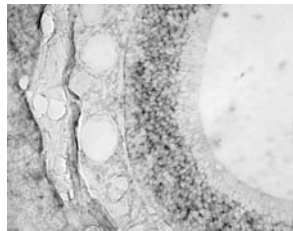

Drd2

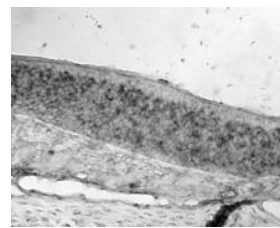

Efn5

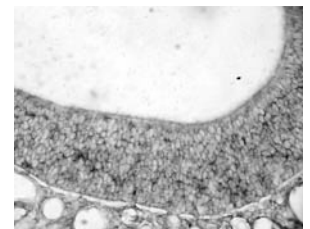

Epc1

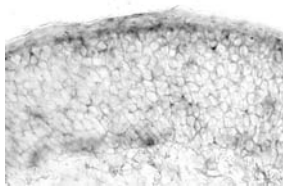

Dp1

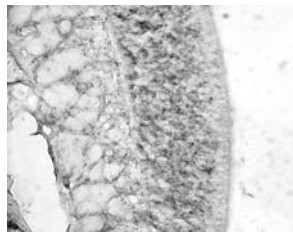

Dscam

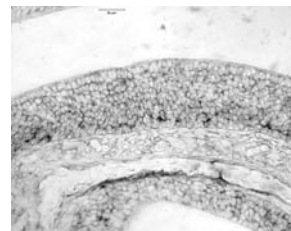

Elavl1

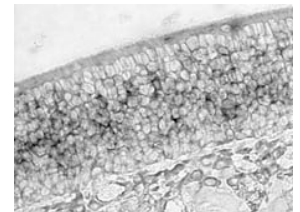

Epha5

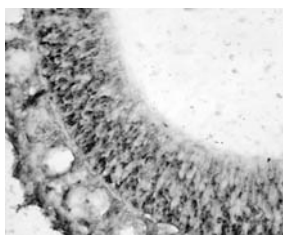

Dppa5

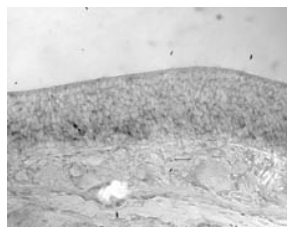

Dscaml1

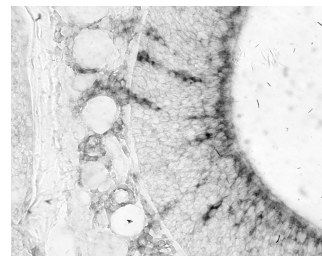

Elf5

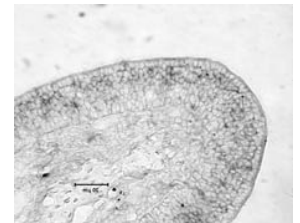

Epha7

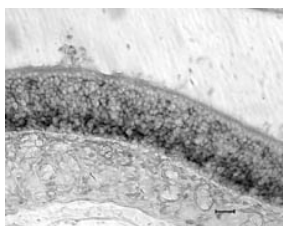

Dpysl2

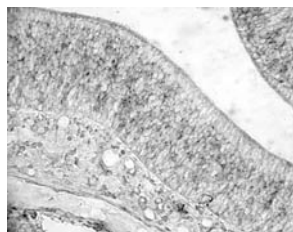

Dst

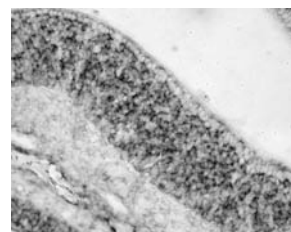

En2

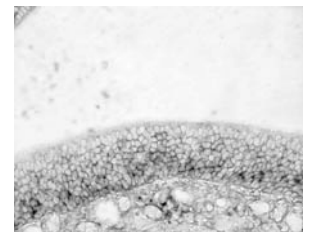

Eya2



Supplemental Figure 1. In situ hybridization for 352 mRNAs

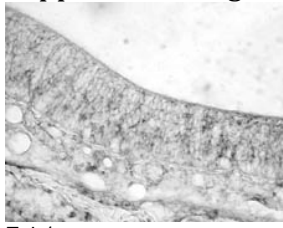

Ezh1

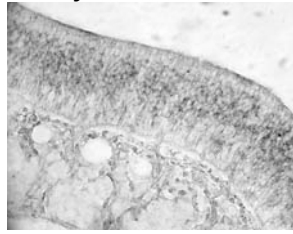

Fgf12

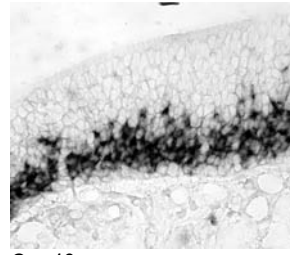

Gap43

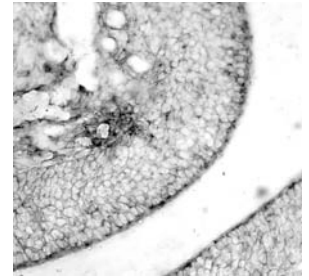

Gpc4

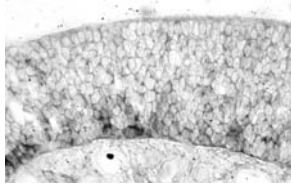

Ezh2

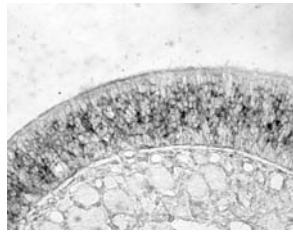

Foxj1

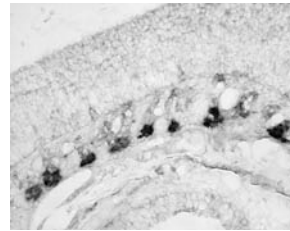

Gas6

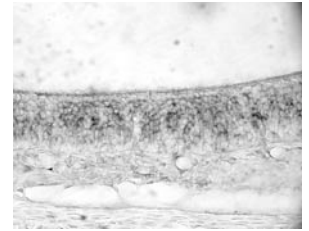

Gpr158

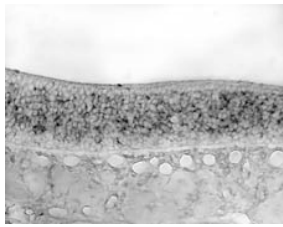

Fads

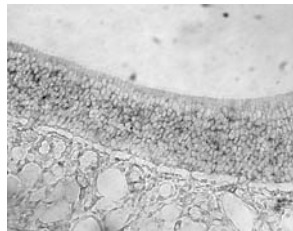

Foxm1

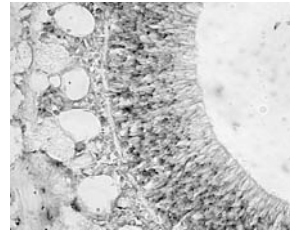

Gas8

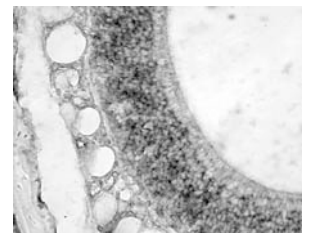

Gprc5c

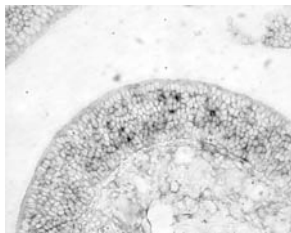

Fank1

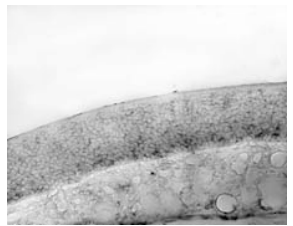

Fsd1

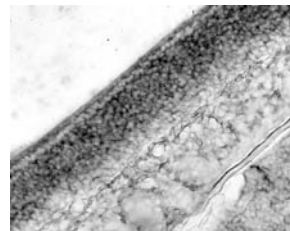

Ghitm

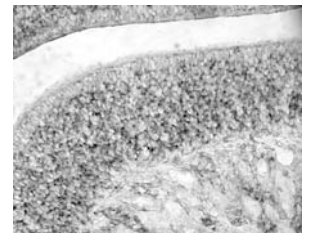

Grm4

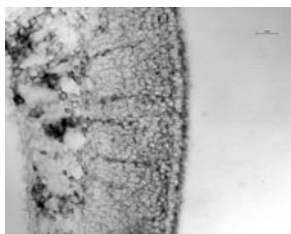

Fetub

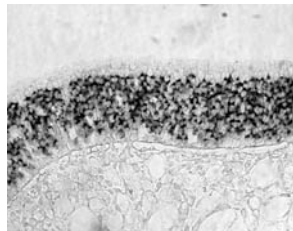

Fstl5

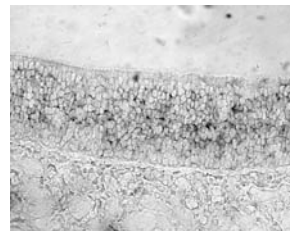

Glt28d2

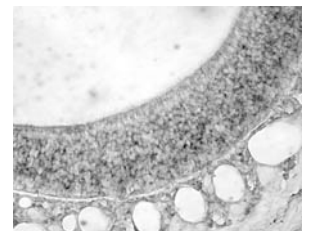

Grp37

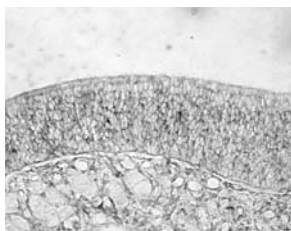

Fgf9

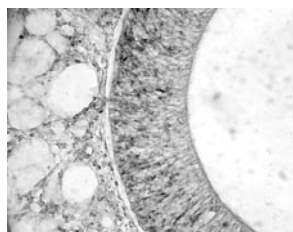

Fzd3

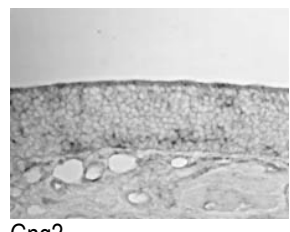

Gng2

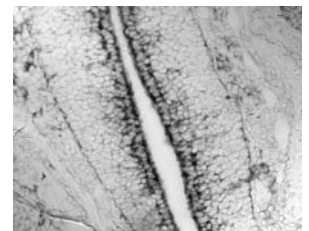

Gstm2
