# Supplementary material
Source: PubMed Central journal article supplement (PMC4023872)
Supplement: NIHMS545532-supplement-Supp_Fig_S1C.pdf [file NIHMS545532-supplement-Supp_Fig_S1C.pdf]

Supplemental Figure 1. In situ hybridization for 352 mRNAs

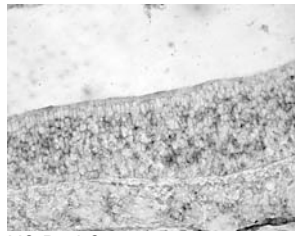

H2-Dmb2

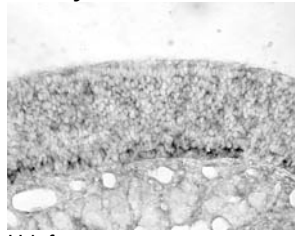

Hdgf

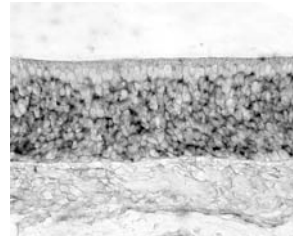

Id4

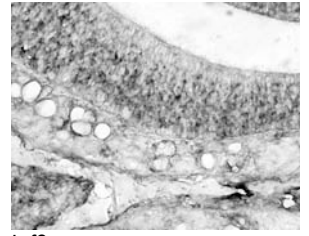

Igf2r

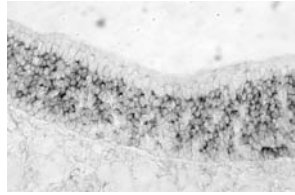

H2afy

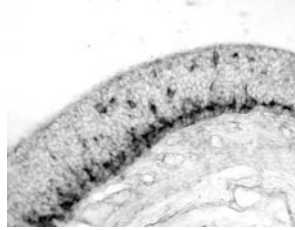

Hes6

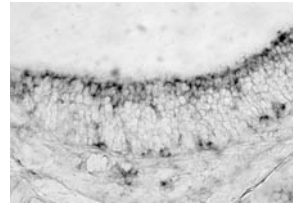

ldb1

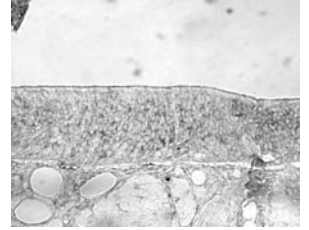

Jam3

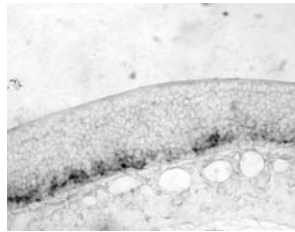

Hdac2

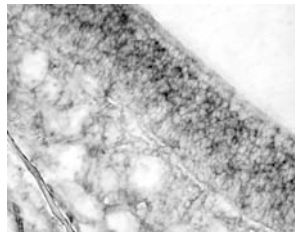

Hfe

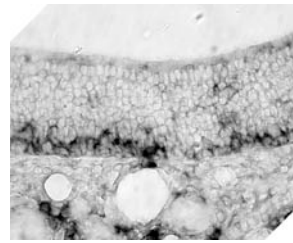

ldb2

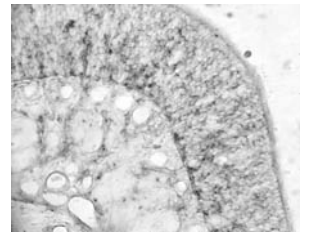

Krt14

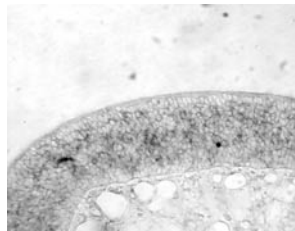

Hdac9

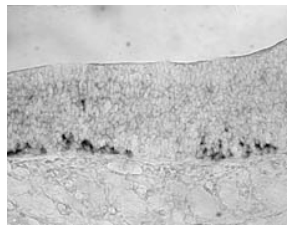

Hist2h2be

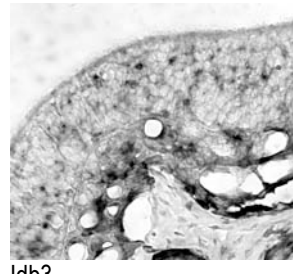

ldb3

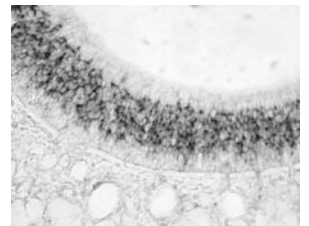

Kcnc4

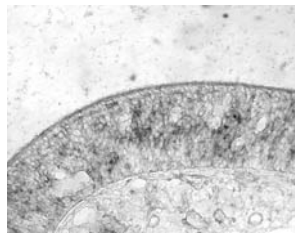

Hdac10

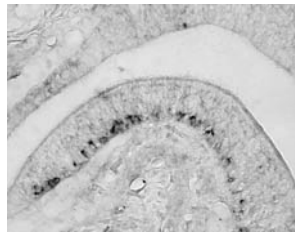

Hmgb2

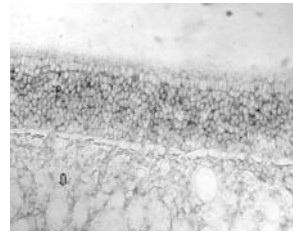

Ifi74

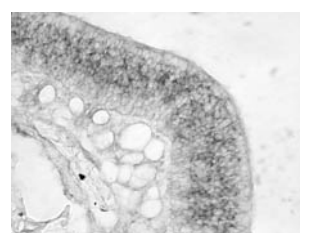

Kcns3

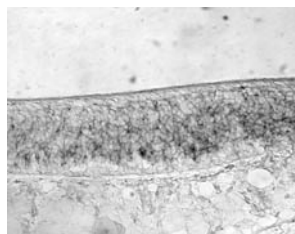

Hdac11

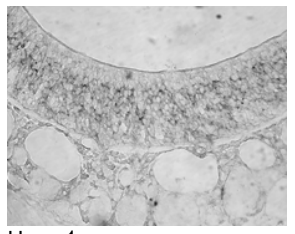

Hmox1

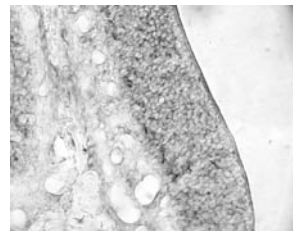

Igfr1

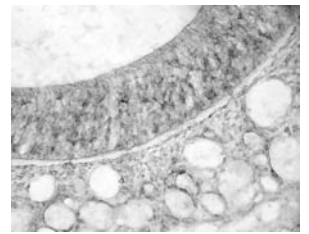

Kctd11

Supplemental Figure 1. In situ hybridization for 352 mRNAs

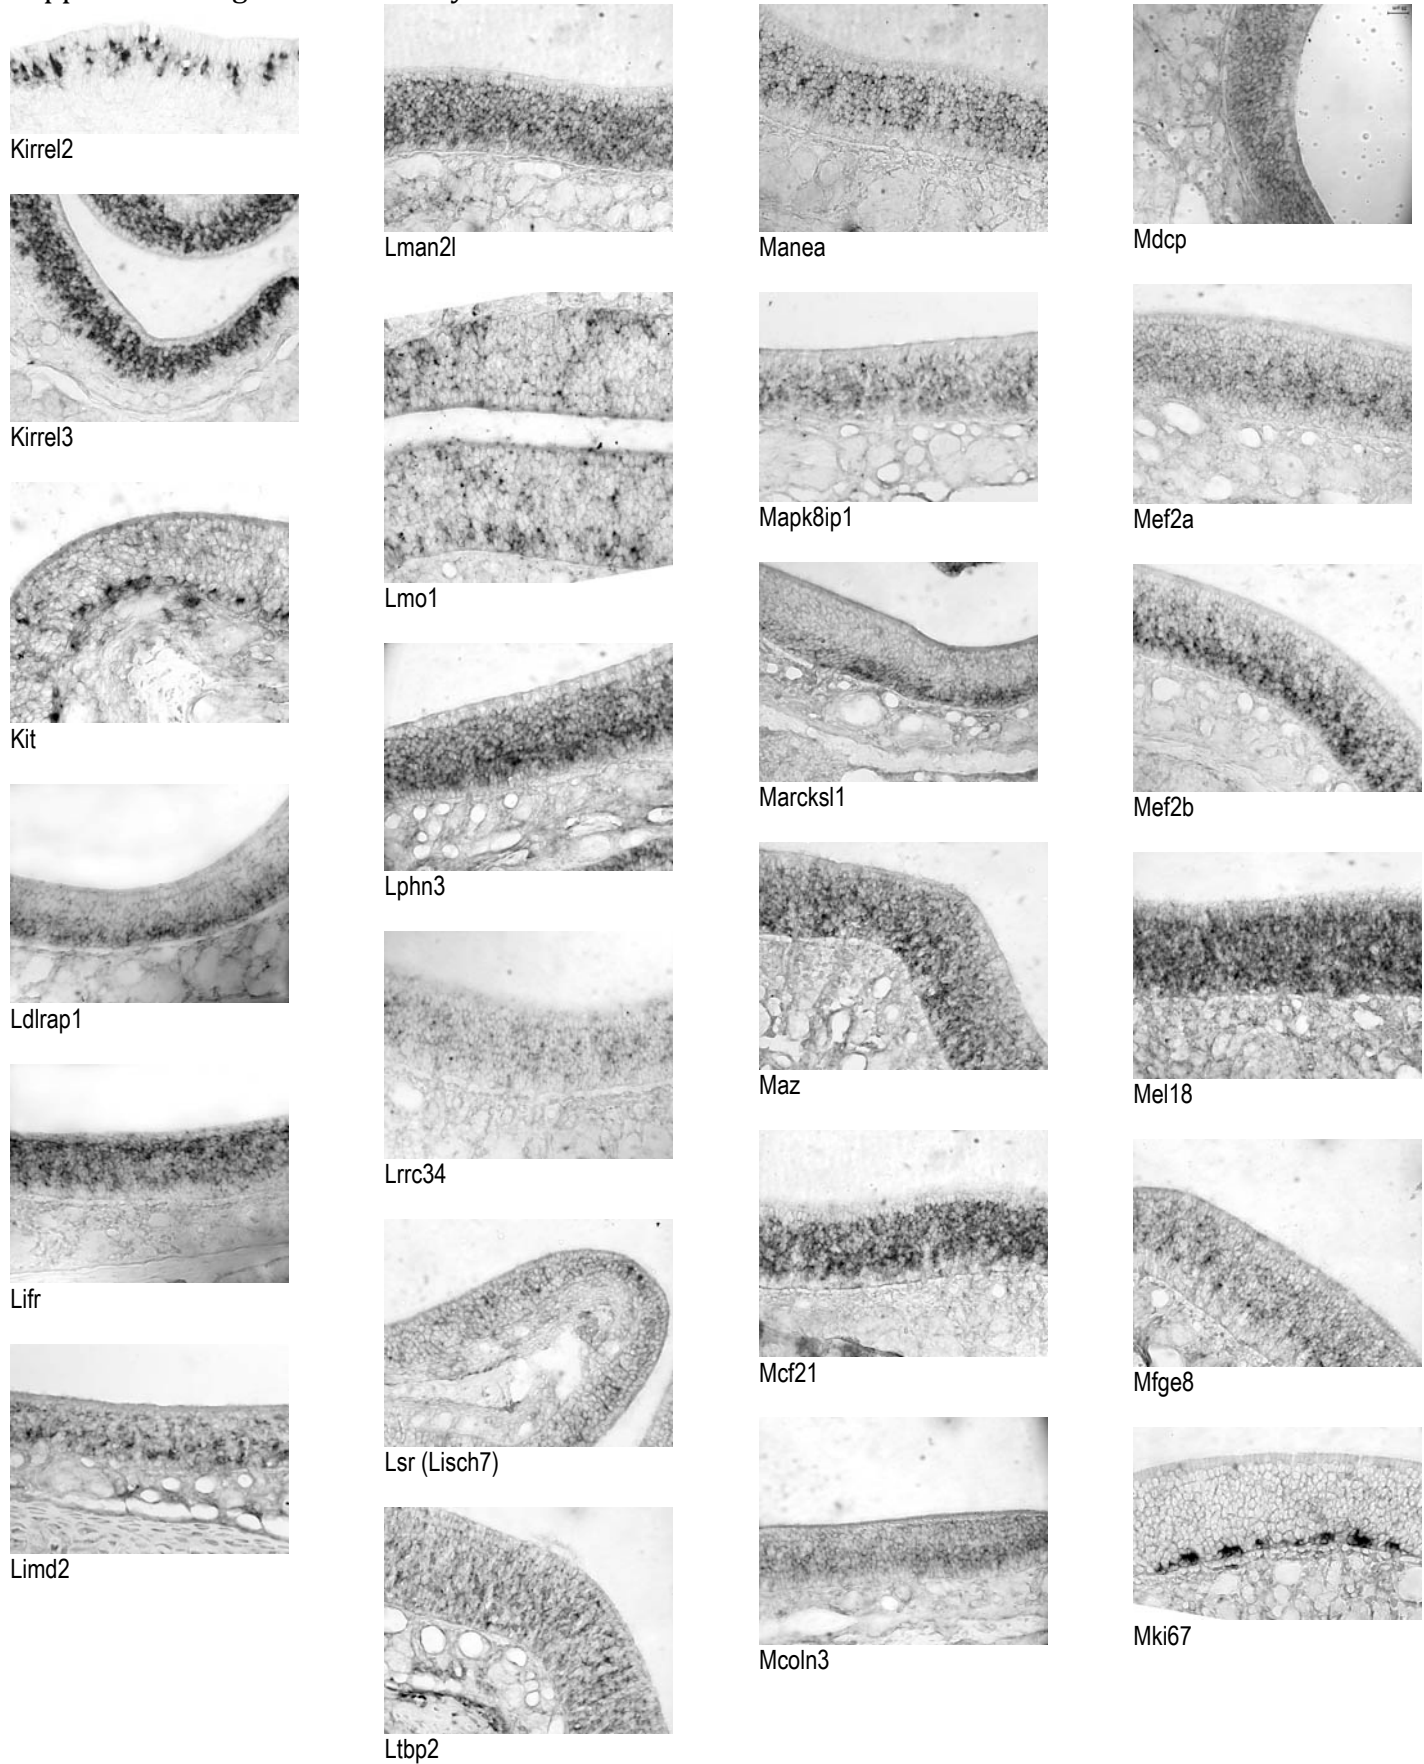

Supplemental Figure 1. In situ hybridization for 352 mRNAs

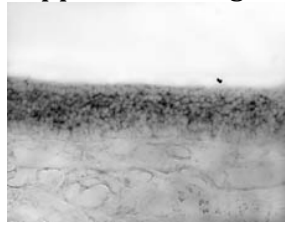

Mpp2

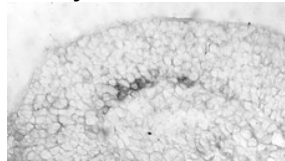

Mybl1

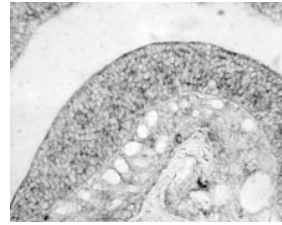

Nck1

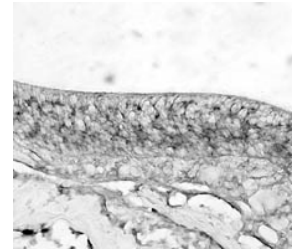

Nfe2l1

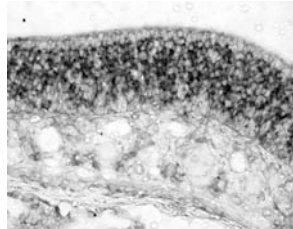

Msi2h

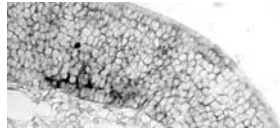

Mycl1 (Lmyc1)

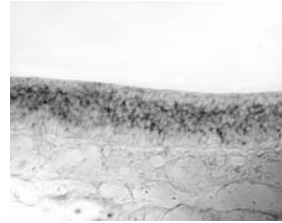

Neu2

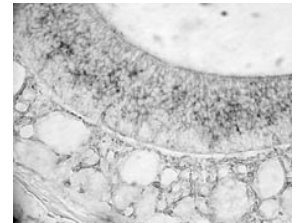

Nfe2l2

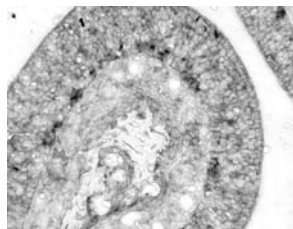

Msx1

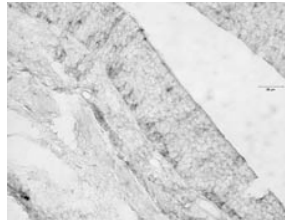

Mycn

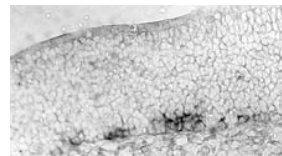

Neurog1

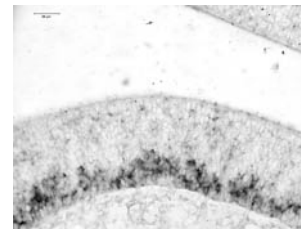

Nhlh1

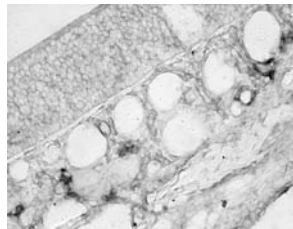

Msx2

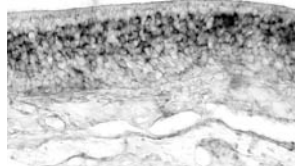

Myo6

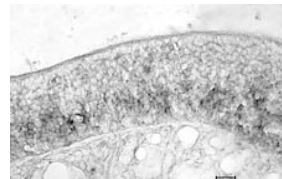

Nfasc

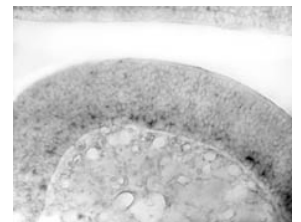

Nhlh2

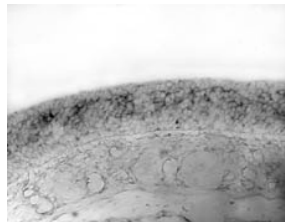

Mtus1

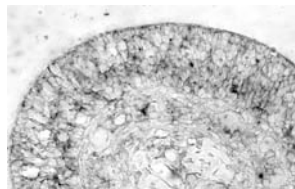

Myst2

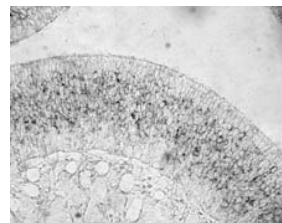

Nfatc1

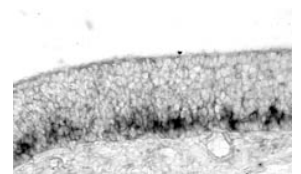

Nnat

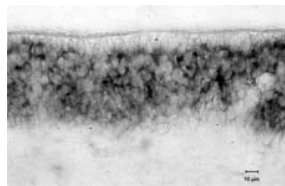

Ncam1

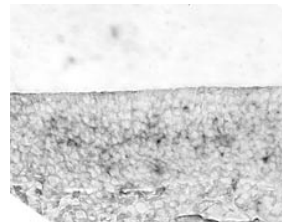

Nfatc2

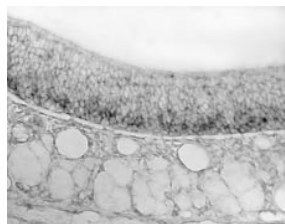

Mtrv2

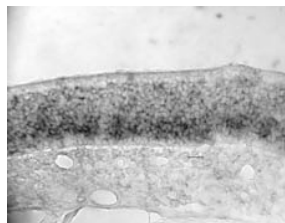

Ncam2

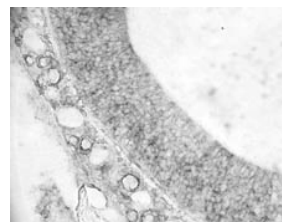

Nfatc3

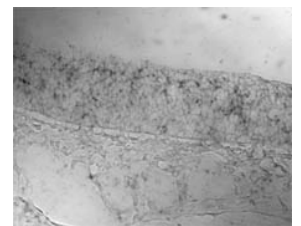

Nol6 (Lmna)
