# Supplementary material
Source: PubMed Central journal article supplement (PMC4023872)
Supplement: NIHMS545532-supplement-Supp_Fig_S1D.pdf [file NIHMS545532-supplement-Supp_Fig_S1D.pdf]

Supplemental Figure 1. In situ hybridization for 352 mRNAs

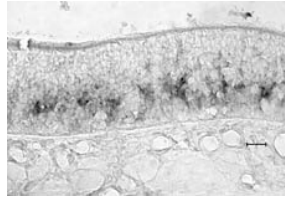

Nrp1

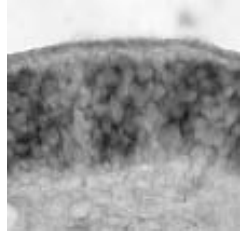

Nrp2

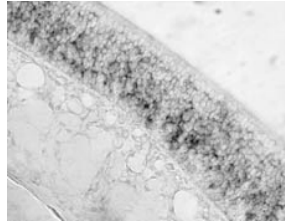

Nrxn1

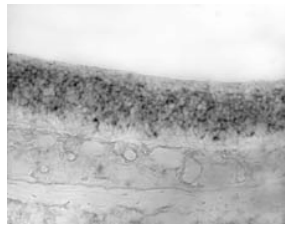

Nptx2

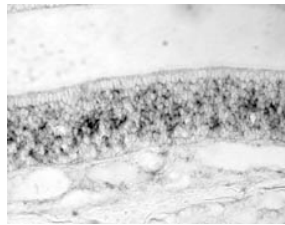

Nrxn1

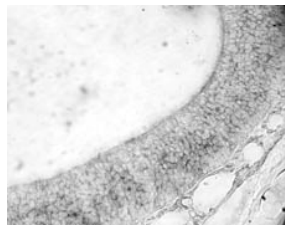

Nspc1

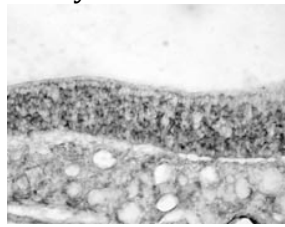

Numb

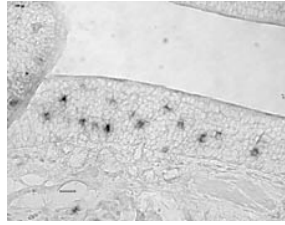

Olfr15

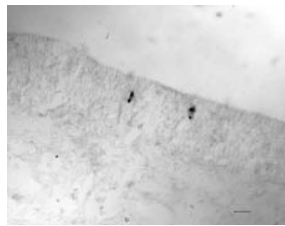

Olfr17

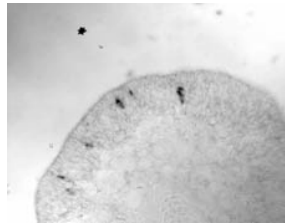

Olfr129

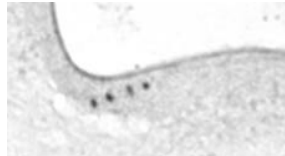

Olfr160

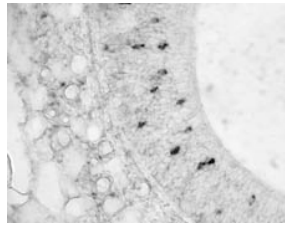

Olfr672

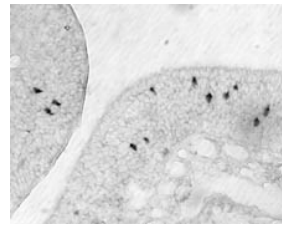

Olfr870

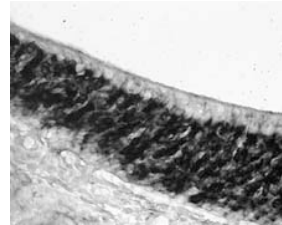

Omp

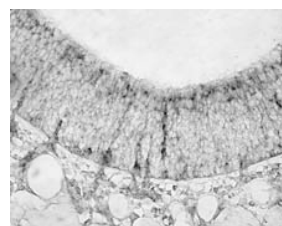

Otx2

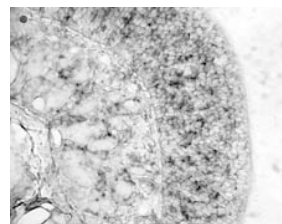

P2rx1

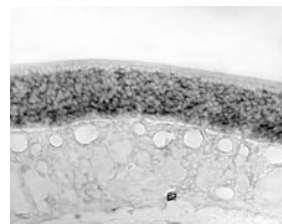

Palm

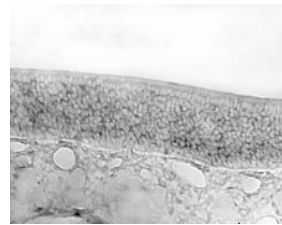

Panx1

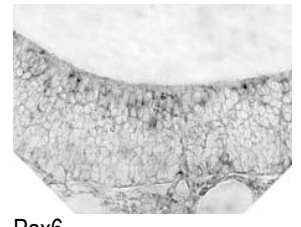

Pax6

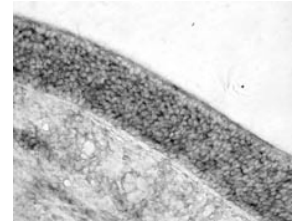

Pbx1

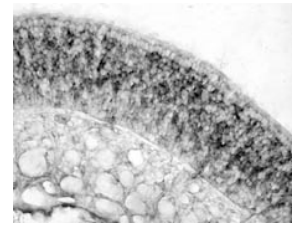

Pbx2

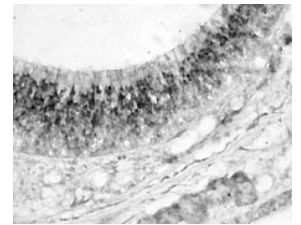

Pcaf

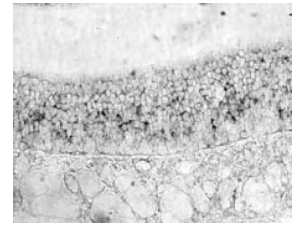

Pcdh7

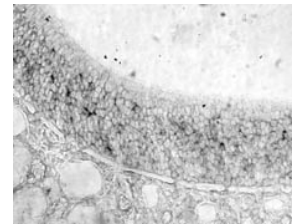

Pcdh10

Supplemental Figure 1. In situ hybridization for 352 mRNAs

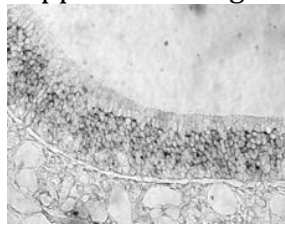

Pcdh21

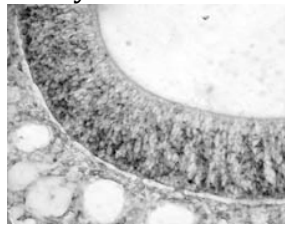

Phc2

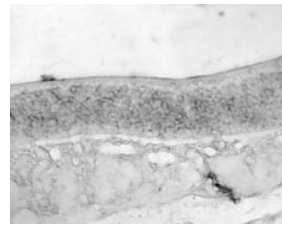

Plxna4

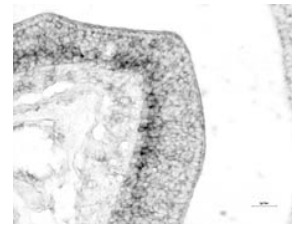

Ppp2cb

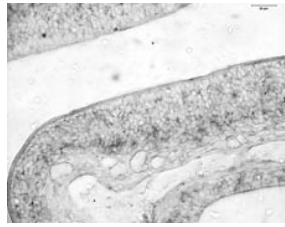

Pclo

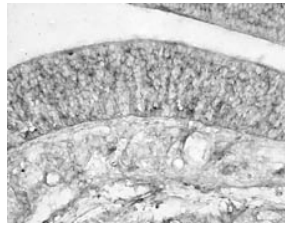

Phtf1

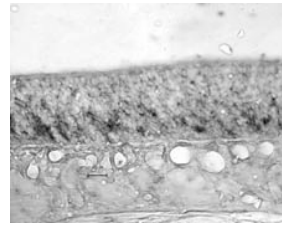

Plxnb1

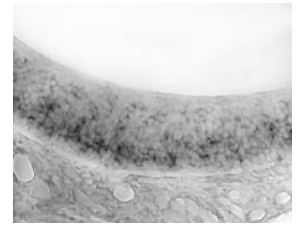

Prkc1b

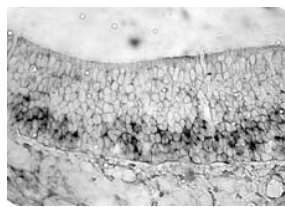

Pde8a

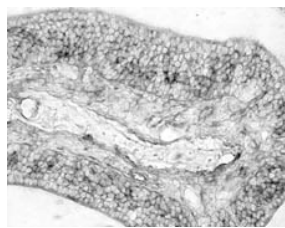

Pknox1

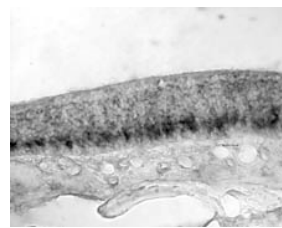

Plxnb2

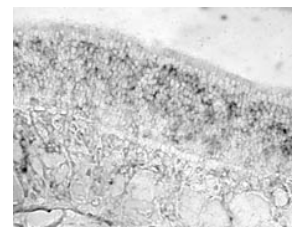

Prom1

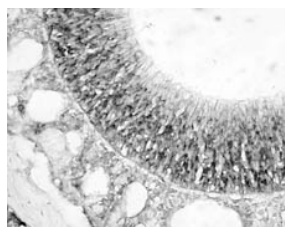

Pdgfa

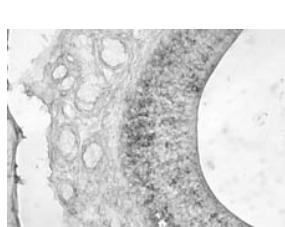

Plxdc2

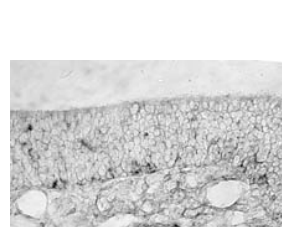

Pola2

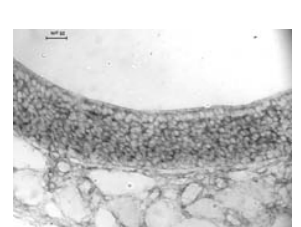

Psmb3

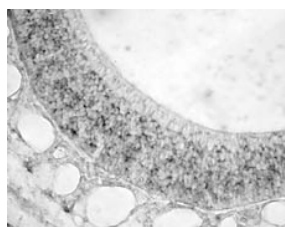

Pdgfrl

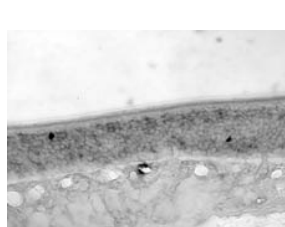

Pllxna1

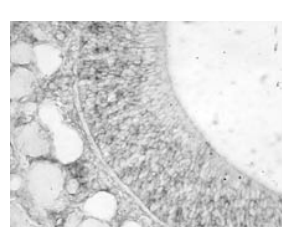

Pou2f2

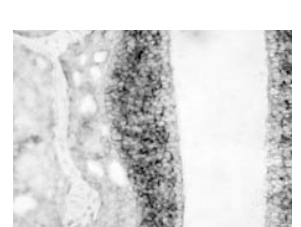

Ptk2

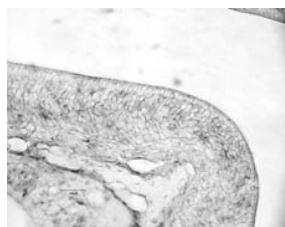

Peg3

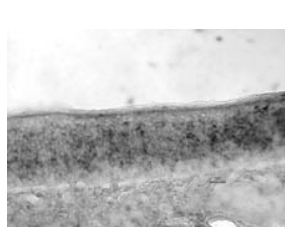

Plxna3

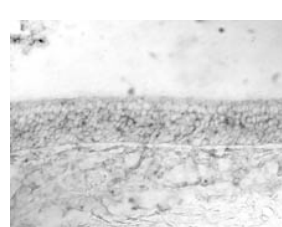

Ppil6

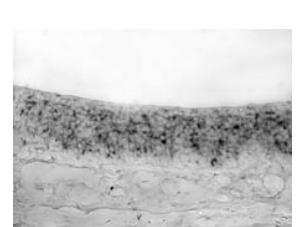

Ptpn3

Supplemental Figure 1. In situ hybridization for 352 mRNAs

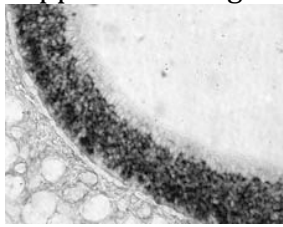

Ptpns

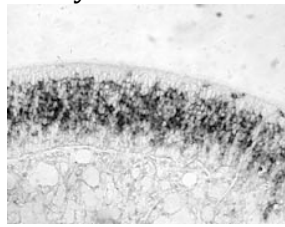

Ric8b

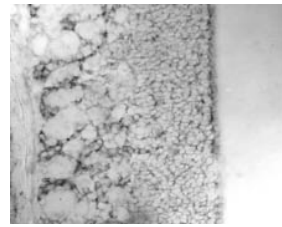

Rpn2

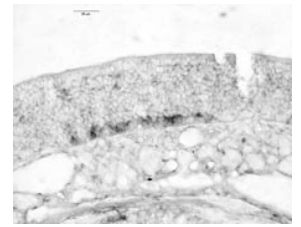

Scg2

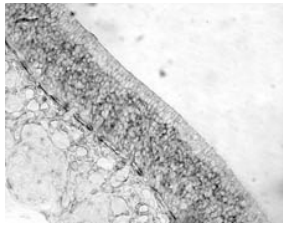

Pygo1

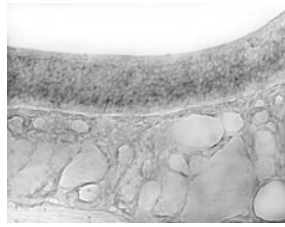

Ripk4

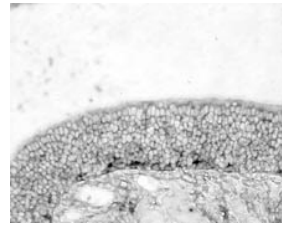

Runx1

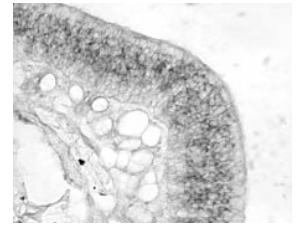

Scn5a

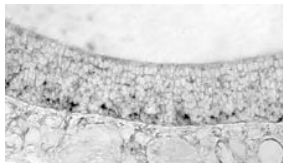

Ran

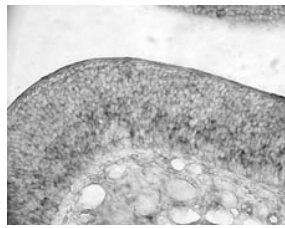

Rnf2

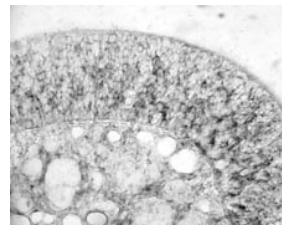

Ryk

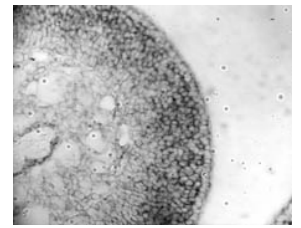

Sdc2

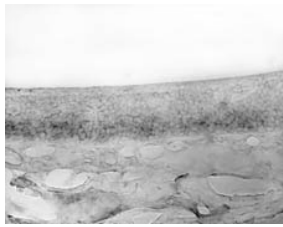

Rbm27

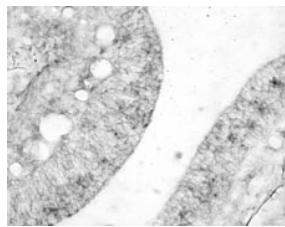

Rootletin (Crocc)

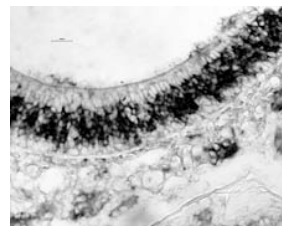

S100a5

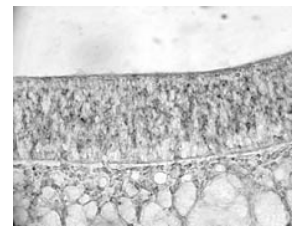

Sdf4

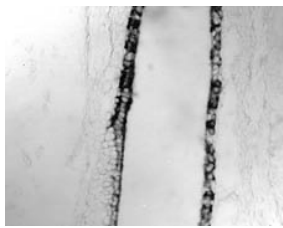

Reg3g

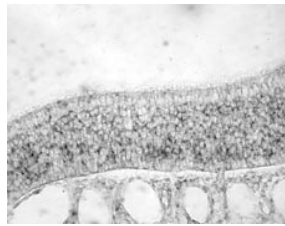

Ropn1l

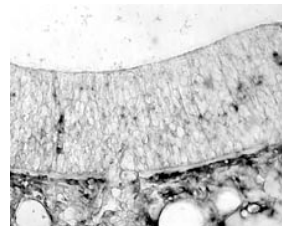

S100a6

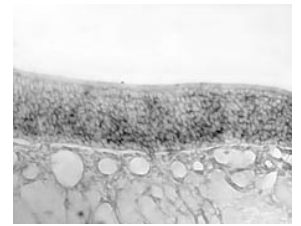

Serpini1

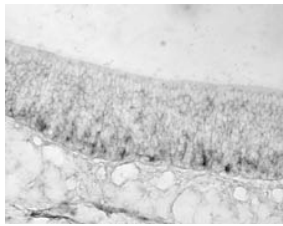

Rgmb

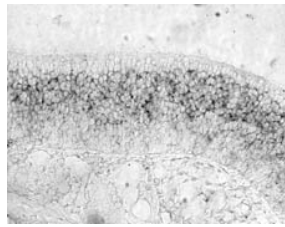

Rp2h

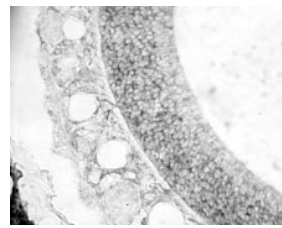

Sap18

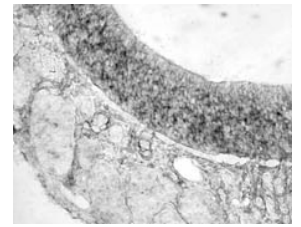

Set7
