# Supplementary material
Source: PubMed Central journal article supplement (PMC4023872)
Supplement: NIHMS545532-supplement-Supp_Fig_S1E.pdf [file NIHMS545532-supplement-Supp_Fig_S1E.pdf]

Supplemental Figure 1. In situ hybridization for 352 mRNAs

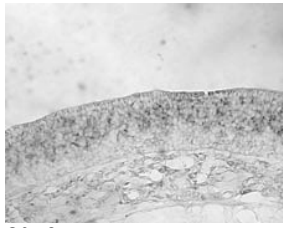

Sfrp2

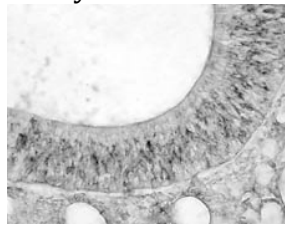

Slc24a4

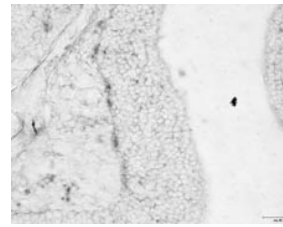

Snai2

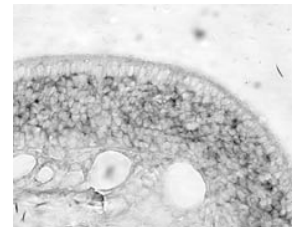

Spa17

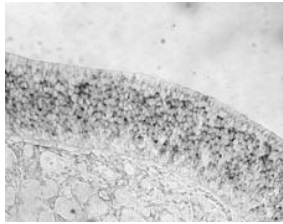

Sgpl1

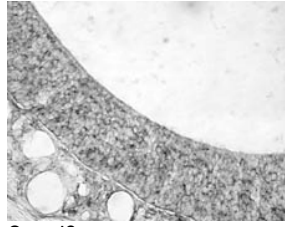

Smad2

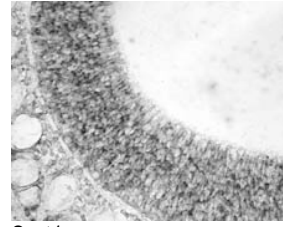

Sort1

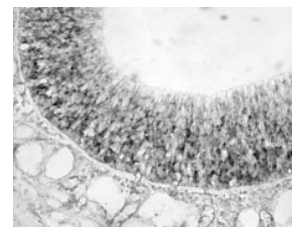

Spag16

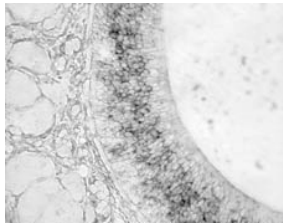

Sh3d1b

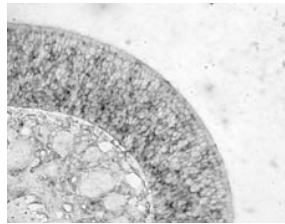

Smarcb1

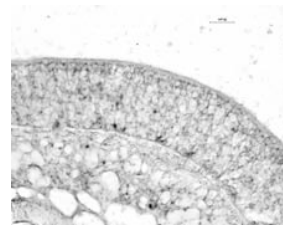

Sox2

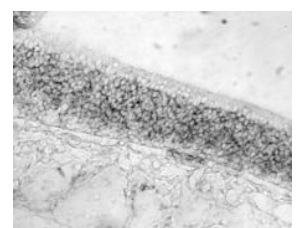

Spef1

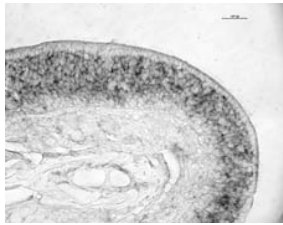

Siah2

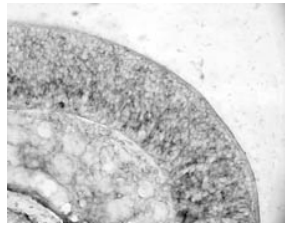

Smarcc1

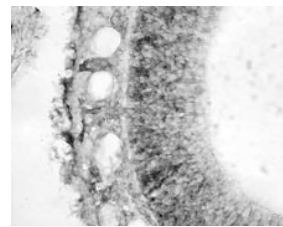

Sox6

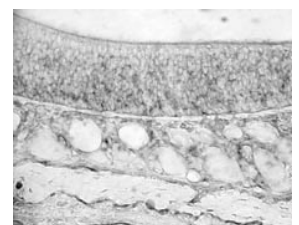

Ssx2ip

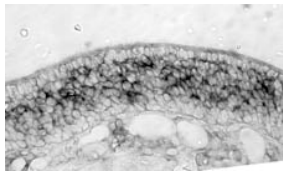

Sirt2

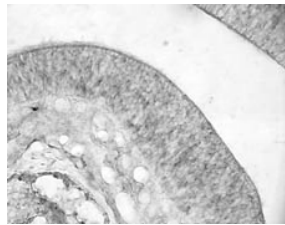

Smarcd1

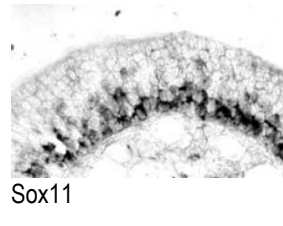

Sox11

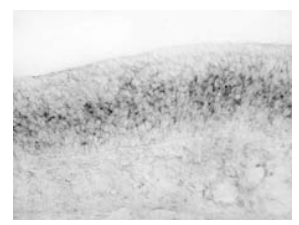

Stk32a (age P6)

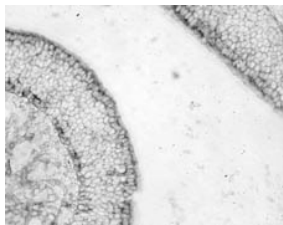

Six1

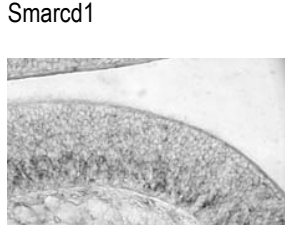

Smarce1

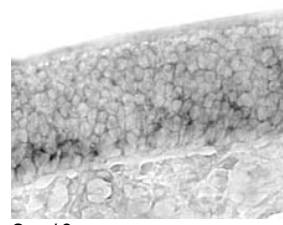

Sox13

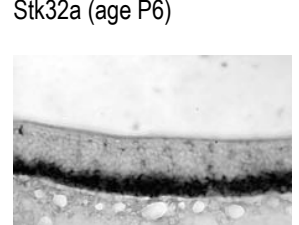

Stmn1

Supplemental Figure 1. In situ hybridization for 352 mRNAs

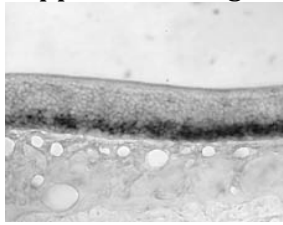

Stmn2

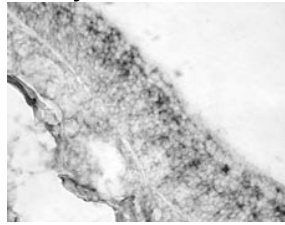

Tappb

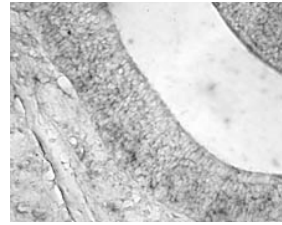

Tieg1

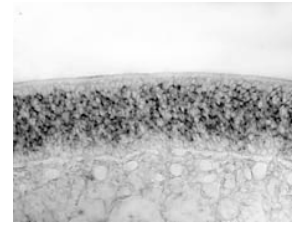

Tmc7

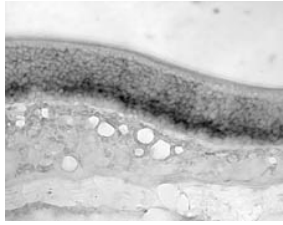

Stmn3

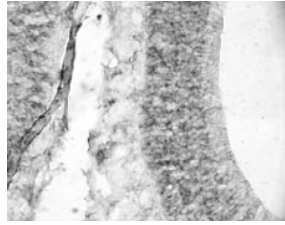

Tcam1

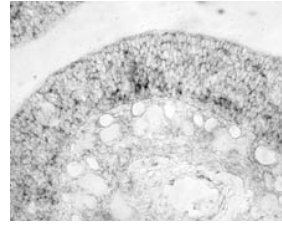

Tle1

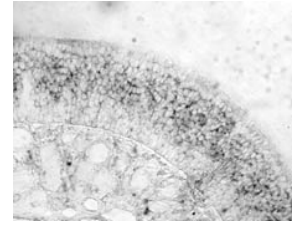

Tmem64

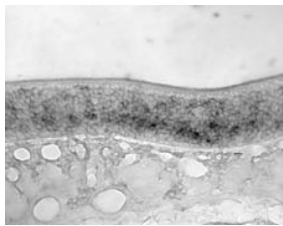

Stmn4

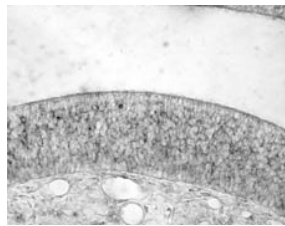

Tcp11

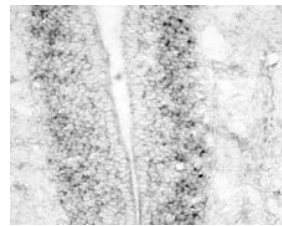

Tle3

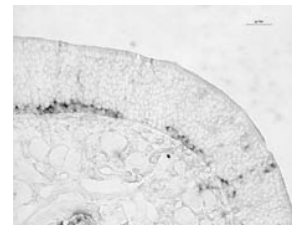

Top2a

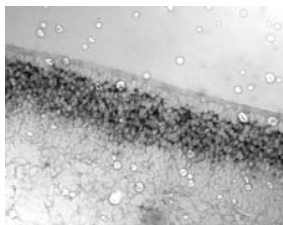

Stom (Epb7.2)

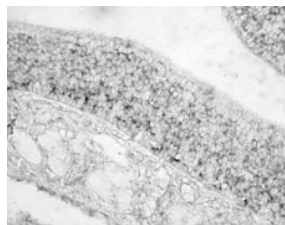

Tead1

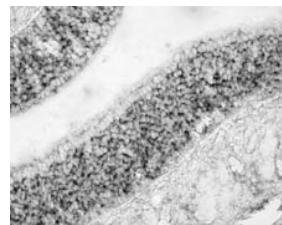

Tlk1

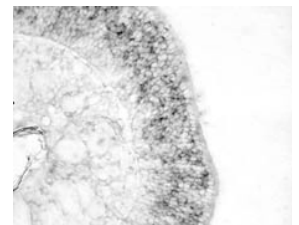

Trek2

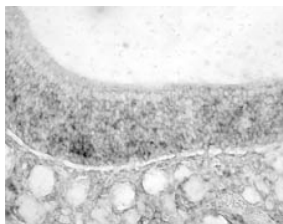

Sufu

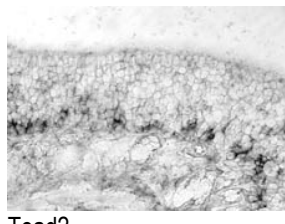

Tead2

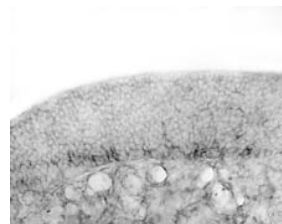

Tln1

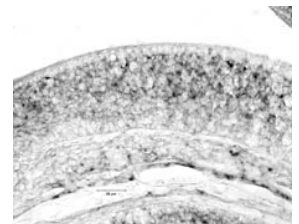

Tsarg

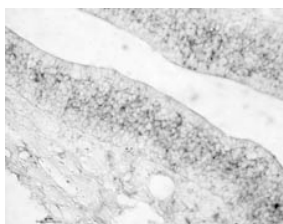

Syn1

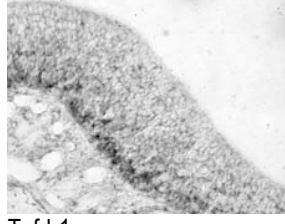

Tgfrb1

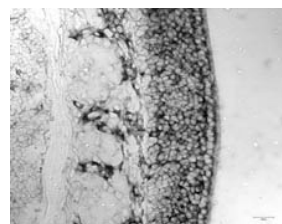

Tmbim6 (Tegt)

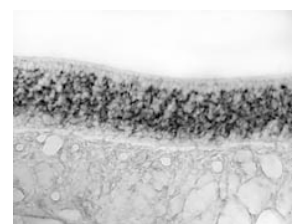

Tspan7

Supplemental Figure 1. In situ hybridization for 352 mRNAs

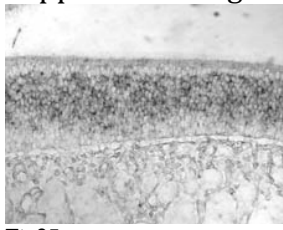

Ttc25

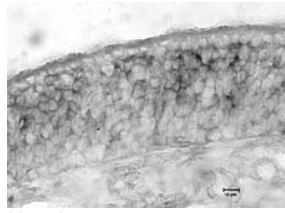

Unc5b

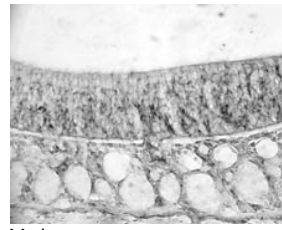

Yy1

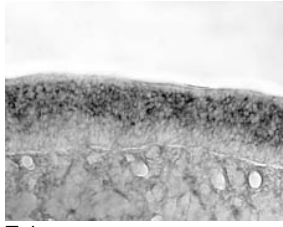

Tub

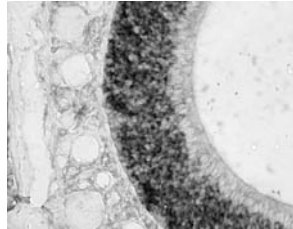

Uncx (Chx4)

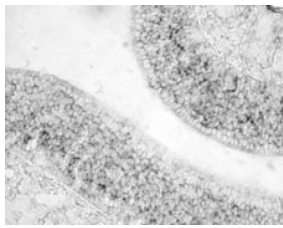

Twsg1

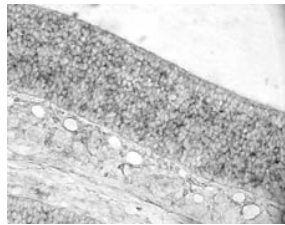

Usf2

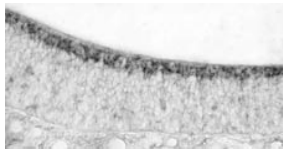

Tyro3

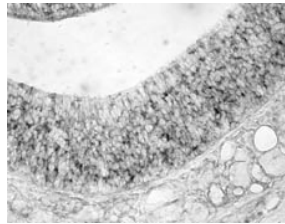

Wasf2

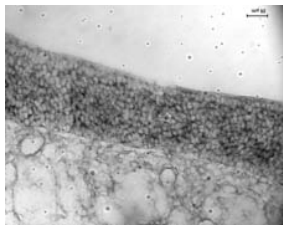

Ube2n

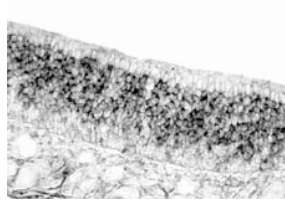

Xbp1

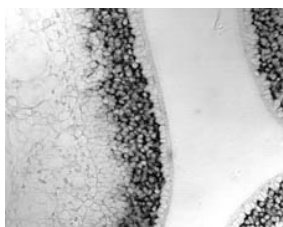

Umodl1

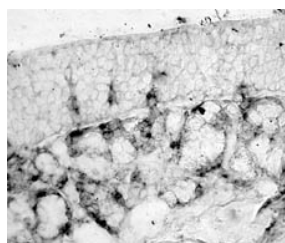

Xdh

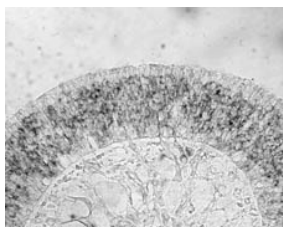

Unc45a
