# Supplementary material
Source: PubMed Central journal article supplement (PMC4023872)
Supplement: NIHMS545532-supplement-Supp_Fig_S3.pdf [file NIHMS545532-supplement-Supp_Fig_S3.pdf]

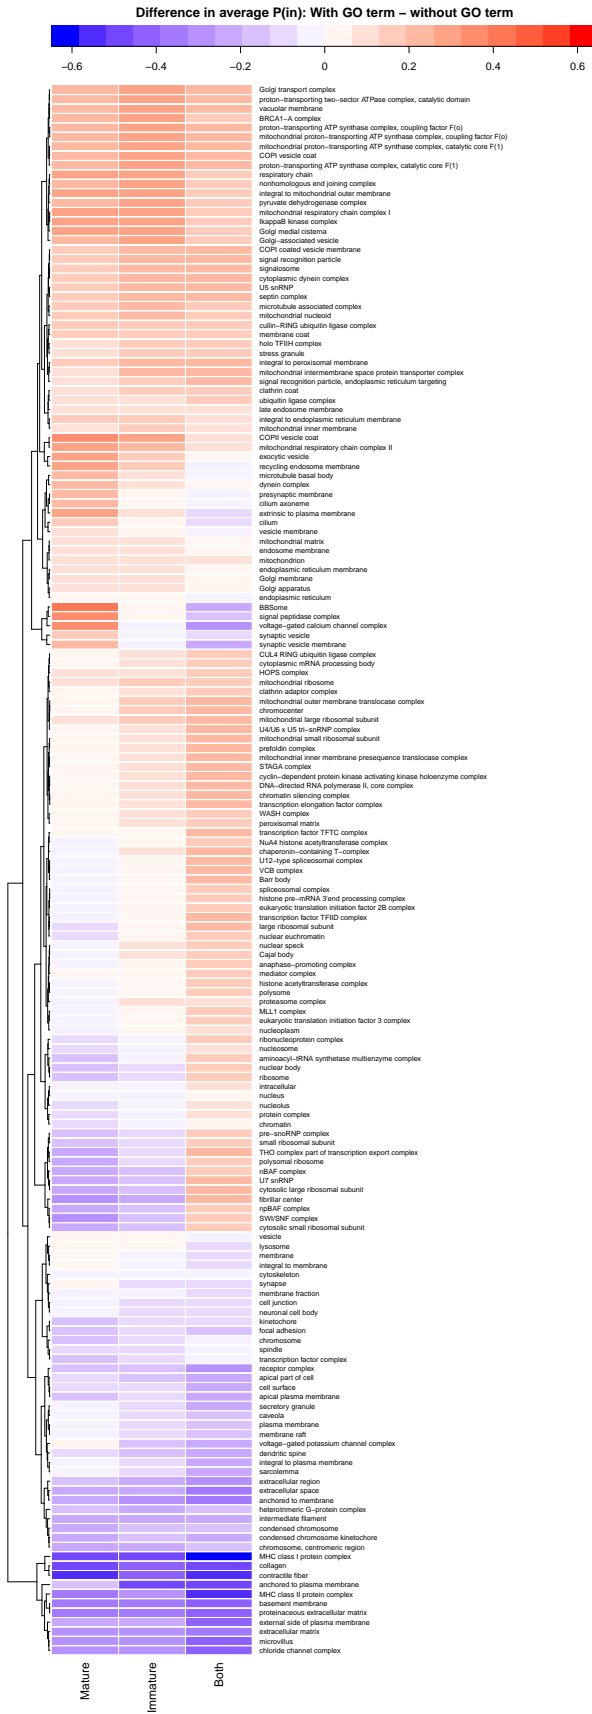

Supplemental Figure 3: Heatmap of average differences in estimated  $P(in)$  probabilities between genes annotated with the specified Gene Ontology (GO) cellular compartment term and genes lacking the term. Probability differences are separated by cell type category. Only terms with significant ( $q < 0.05$ ) differences are listed.
